# Supplementary material
Source: bioRxiv or medRxiv preprint supplement (https://www.biorxiv.org/highwire/filestream/23330/field_highwire_adjunct_files/12/083931-6.pdf)

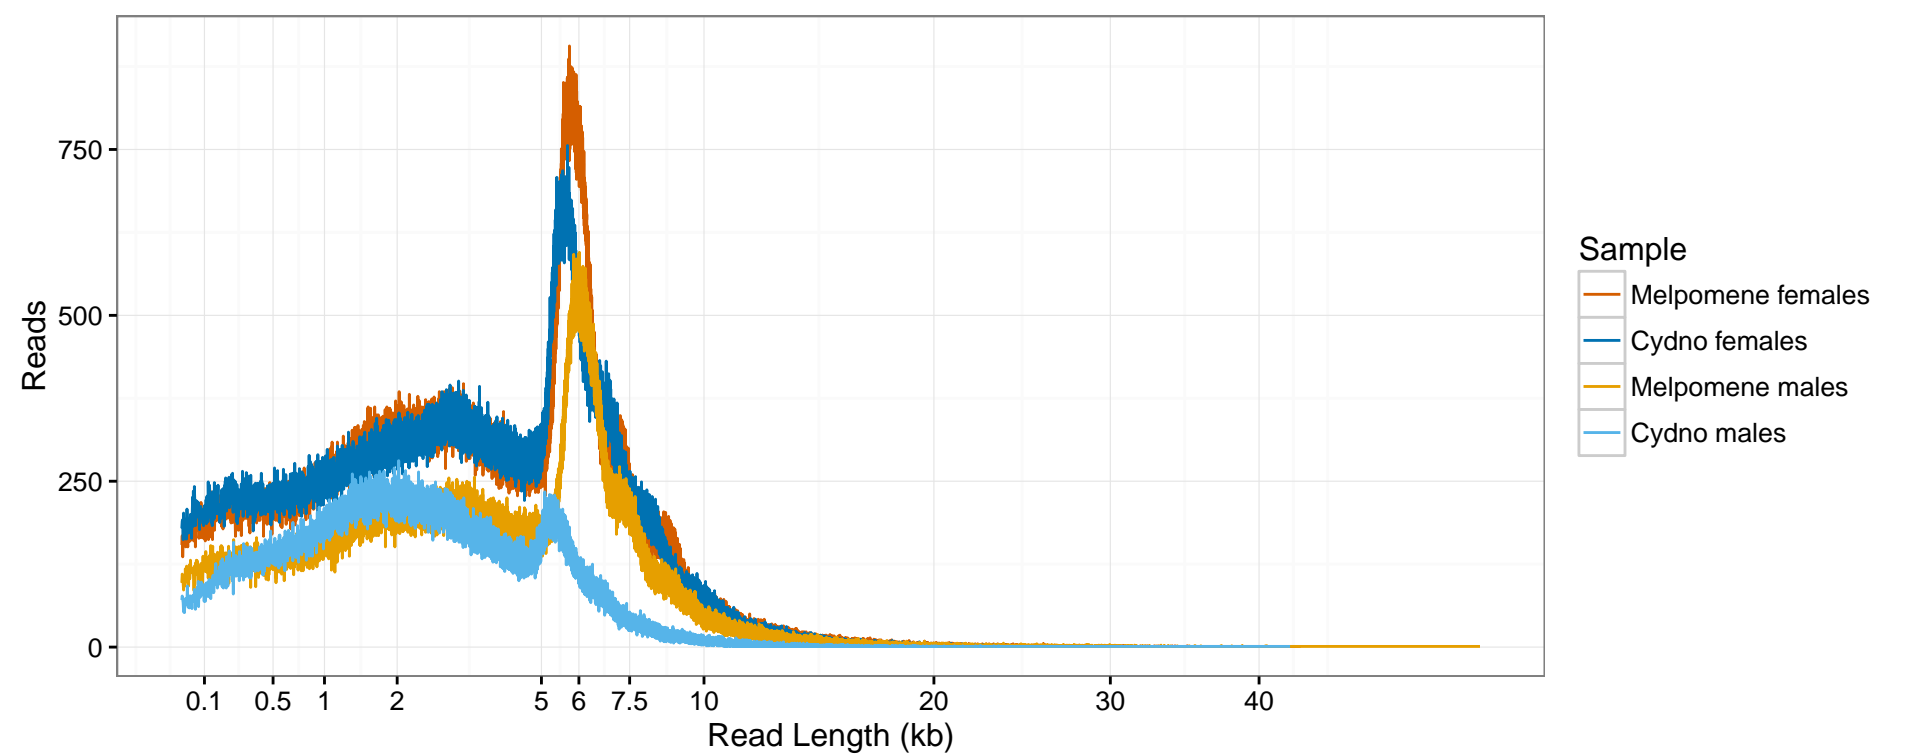

Supplement: Supplementary file [file 083931-6.pdf]
